# Supplementary material for: Biohydrogen Production by the Thermophilic Bacterium Caldicellulosiruptor saccharolyticus: Current Status and Perspectives
Source: Life (Basel). 2013 Jan 17;3(1):52–85. doi: 10.3390/life3010052 (PMC4187192; doi:10.3390/life3010052)
Supplement: Supplementary File 1 — Supplementary Table 1 (XLSX, 19 KB) [file life-03-00052-s001.xlsx]

## Sheet: Glucose oxidation
	Gibbs reaction energy of glucose oxidation as a function of H2 concentration and temperature
	Standard gibbs reaction energy								H2 aq
									kJ/reaction
									25oC		70oC
	Glucose + 4 H2O -> 2 Acetate- + 2 HCO3- + 4 H+ + 4 H2						eq1		-142.56		-153.08
	Glucose + 2 H2O -> 2 Ethanol + 2 HCO3- + 2 H+						eq2		-231.78		-239.74
	Glucose -> 2 Lactate- + 2 H+						eq3		-195		-198.62
	Gibbs fromation energy				-ΔGfº
				KJ/mol
				25oC		70oC
				298.15		343.15
		a-D-Glucose, aq		-910.3		-923.64		from Amend and Plyasunov 2001
		CO2, g		-394.36		-404.1		from Amend and Shock 2001
		CO2, aq		-387.44		-391.99		from Amend and Shock 2001
		HCO3-, aq		-586.94		-591.29		from Amend and Shock 2001
		Acetate-, aq		-369.33		-373.31		from Amend and Shock 2001
		Lactate-, aq		-512.67		-519.06		from Amend and Shock 2001
		Ethanol, aq		-181.3		-188.9		from Amend and Shock 2001
		H+, aq		0		0		from Amend and Shock 2001
		H2, gas		0		-5.97		from Amend and Shock 2001
		H2, aq		17.72		14.62		from Amend and Shock 2001
		H+ (neutrality), aq		-39.98		-42.07		from Amend and Shock 2001
		H20, liq		-237.18		-240.57		from Amend and Shock 2001
				ΔG′ = ΔGo′ + RT ln([C][D] / [A][B]).
		R gas constant (J/mol*K)
		8.31446				M			mM			uM
						1	0.1	0.01	0.001	0.0001	1e-05	1e-06	1e-07	1e-08
		R*T (J/mol)			LN(x)	0	-9.21034	-18.4207	-27.631	-36.8414	-46.0517	-55.262	-64.4724	-73.6827
	298.15 K	2.47771			(RT)*LN(x)	0	-22.8205	-45.6411	-68.4616	-91.2822	-114.103	-136.923	-159.744	-182.564
	343.15 K	2.85311			(RT)*LN(x)	0	-26.2781	-52.5562	-78.8343	-105.112	-131.39	-157.669	-183.947	-210.225
		R	T	ΔGo′		ΔG′
H2 (aq), 298.15 K		8.31446	298	-142.56		-142.56	-165.381	-188.201	-211.022	-233.842	-256.663	-279.483	-302.304	-325.124
H2 (aq), 343.15 K		8.31446	343.15	-153.08		-153.08	-179.358	-205.636	-231.914	-258.192	-284.47	-310.749	-337.027	-363.305
				Lac, 298.15		-195	-195	-195	-195	-195	-195
				Lac, 343.15		-198.62	-198.62	-198.62	-198.62	-198.62	-198.62
				EtOH, 298.15		-231.78	-231.78	-231.78	-231.78	-231.78	-231.78
				EtOH, 343.15		-239.74	-239.74	-239.74	-239.74	-239.74	-239.74
								Intercepts		Ace, Lac	Ace, EtoOH
										M	M
								H2 (aq), 298.15 K		0.00503583	0.000123131
								H2 (aq), 343.15 K		0.0184926	0.000503728
