# Supplementary material for: Biohydrogen Production by the Thermophilic Bacterium Caldicellulosiruptor saccharolyticus: Current Status and Perspectives
Source: Life (Basel). 2013 Jan 17;3(1):52–85. doi: 10.3390/life3010052 (PMC4187192; doi:10.3390/life3010052)
Supplement: Supplementary File 2 — Supplementary Table 2 (XLSX, 24 KB) [file life-03-00052-s002.xlsx]

## Sheet: Proton reduction
	Gibbs reaction energy of proton reduction by NADH or Fdred as a function of H2 concentration and temperature
				Eo'						oC	K	Gn	pH neutrality
	NAD+/NADH			-320	from Thauer 1977					25	298.15	-39.95	7
	Fdox/Fdred			-400	from Thauer 1977					70	343.15	-42.07	6.41
	H+/H2			-414	from Thauer 1977					100	373.15	-43.78	6.13
											ΔGo′ = ΔGo + ƲH+Gn		from Amend shock 2001
	Faraday constant (J)
	96485.3
	R gas constant (J/mol*K)
	8.31446
	H2 formation
						Eo'
	NADH/NAD+			H+/H2		-414	mV
				NAD+/NADH		-320	mV
							-94	mV	Eo'
							-0.094	V
							2		n
							96.485	kJ	F
						ΔGo′	18.1392	kJ		(25oC, pH7)
	Fdox/Fdred					Eo'
				H+/H2		-414	mV
				Fdox/Fdred		-400	mV
							-14	mV	Eo'
							-0.014	V
							2		n
							96.485	kJ	F
						ΔGo′	2.70158	kJ		(25oC, pH7)
	Gibbs reaction energy at different Temps.
	enthalpie		ΔGo = ΔHo -TΔSo
	NADH + H+ = NAD+ + H2
		25oC			ΔGo	-21.8108		from Burton 1974
					ΔHo	29.2		from Burton 1974
					T	298.15			(25oC)
					ΔSo	0.171091
		at neutrality			ΔGo′ = ΔGo + RT ln([H+]).					pH	7		(25oC)
										[H+]	1e-07
					ΔGo′	18.1452
		70oC			ΔSo	0.171091
					ΔHo	29.2
					T	343.15
					ΔGo	-29.5099
		at neutrality			ΔGo′	12.6007				pH	6.41		(70oC)
										[H+]	3.89045e-07
		100oC			ΔSo	0.171091
					ΔHo	29.2
					T	373.15
					ΔGo	-34.6427
		at neutrality			ΔGo′	9.14924				pH	6.13		(100oC)
										[H+]	7.4131e-07
	2Fdox + H2 =2Fdred + 2H+
		25oC
		Fdox + 1/2 H2 = Fdred + H+			ΔHo	-21.3		from Watt 1975
		2Fdred + 2H+ = 2Fdox + H2			ΔHo	42.6
					ΔGo	-37.2484		from Thauer 1977 (-400mV), Amend shock 2001 (25oC, pH7))
					T	298.15
					ΔSo	0.267813
		at neutrality			ΔGo′ = ΔGo + RT ln([H+]).					pH	7		(25oC)
										[H+]	1e-07
					ΔGo′	2.70764
						2.70158
		70oC			ΔSo	0.267813
					ΔHo	42.6
					T	343.15
					ΔGo	-49.3
		at neutrality			ΔGo′	-7.18936				pH	6.41		(70oC)
						-7.23				[H+]	3.89045e-07
		100oC			ΔSo	0.267813
					ΔHo	42.6
					T	373.15
					ΔGo	-57.3344
		at neutrality			ΔGo′	-13.5425				pH	6.13		(70oC)
						-13.5544				[H+]	7.4131e-07
	Gibbs reaction energy
	Transformation H2(g) = H2(aq)					ΔGo′		from Amend shock 2001
					oC	H2(g)	H2(aq)		diff
					25	0	17.72		17.72
					70	-5.97	14.62		20.59
					100	-10.05	12.08		22.13
	Gibbs reaction energy at different H2 concentrations
						R gas constant (J/mol*K)				M			mM			uM
						8.31446				1	0.1	0.01	0.001	0.0001	1e-05	1e-06	1e-07	1e-08
									LN(x)	0	-2.30259	-4.60517	-6.90776	-9.21034	-11.5129	-13.8155	-16.1181	-18.4207
		NADH + H+ = NAD+ + H2			ΔGo′
					H2(g)	H2(aq)	T	RT kJ/mol)
					18.1452	35.8652	298.15	2.47896		35.8652	30.1572	24.4492	18.7412	13.0332	7.3252	1.61719	-4.09082	-9.79883
					12.6007	33.1907	343.15	2.85311		33.1907	26.6212	20.0517	13.4822	6.91263	0.343107	-6.22642	-12.7959	-19.3655
					9.14924	31.2792	373.15	3.10254		31.2792	24.1354	16.9915	9.84765	2.70378	-4.44009	-11.584	-18.7278	-25.8717
		2Fdred + 2H+ = 2Fdox + H2			ΔGo′
					H2(g)	H2(aq)	T	RT kJ/mol)
					2.70764	20.4276	298.15	2.47896		20.4276	14.7196	9.01163	3.30362	-2.40439	-8.1124	-13.8204	-19.5284	-25.2364
					-7.18936	13.4006	343.15	2.85311		13.4006	6.83112	0.261596	-6.30793	-12.8775	-19.447	-26.0165	-32.586	-39.1555
					-13.5425	8.58751	373.15	3.10254		8.58751	1.44364	-5.70022	-12.8441	-19.988	-27.1318	-34.2757	-41.4196	-48.5634
		1/2NADH + 3/2H+ Fdred+ = Fdox + 1/2NAD+ + H2.								28.1464	22.4384	16.7304	11.0224	5.31441	-0.393602	-6.10161	-11.8096	-17.5176
		Bifucrating system								23.2957	16.7262	10.1566	3.58711	-2.98241	-9.55193	-16.1215	-22.691	-29.2605
										19.9334	12.7895	5.64564	-1.49822	-8.64209	-15.786	-22.9298	-30.0737	-37.2176
													Intercepts		NADH, 0	Fd, 0	Bifuration, 0
															M	M	M
													H2 (aq), 298.15 K		5.20812e-07	0.000263774	1.17208e-05
													H2 (aq), 343.15 K		8.86692e-06	0.0091239	0.000284431
															mM	mM	mM
															0.000520812	0.263774	0.0117208
															0.00886692	9.1239	0.284431
															uM	uM	uM
															0.520812	263.774	11.7208
															8.86692	9123.9	284.431
